# Supplementary material
Source: MDPI journal article supplement (https://www.mdpi.com/2073-4344/14/1/5)
Supplement: s1 [file s1]

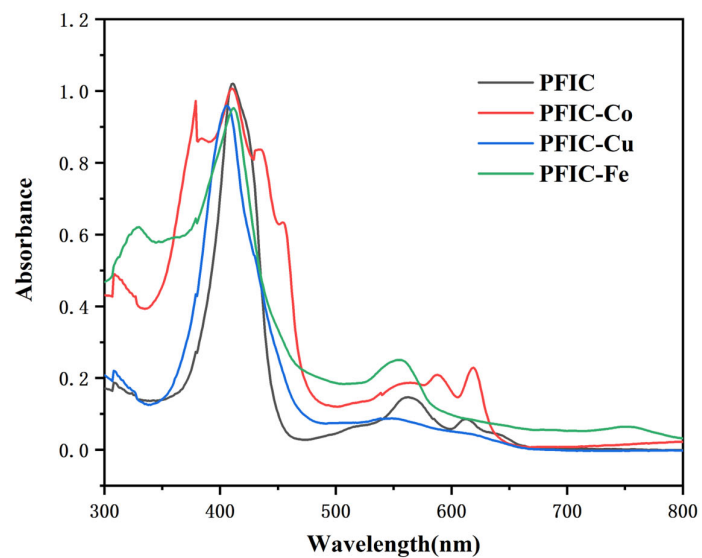

**Figure S1.** UV-vis spectrum of PFIC and PFIC-Co, PFIC-Cu and PFIC-Fe in  $\text{CH}_2\text{Cl}_2$ .

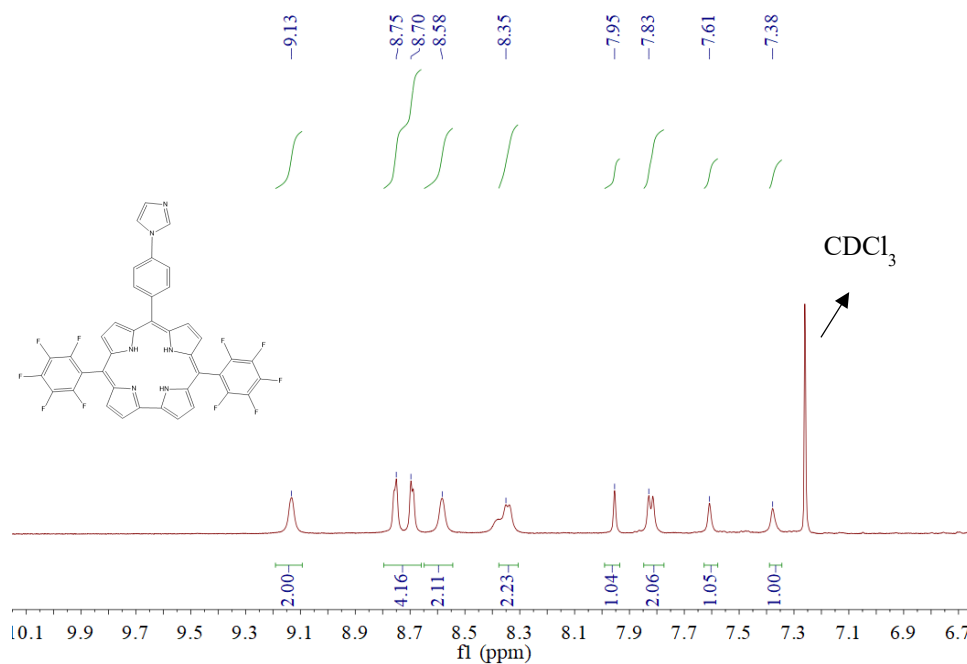

**Figure S2.**  $^1\text{H}$  NMR spectrum of 5,15-bis-(pentafluorophenyl)-10-[4-(1H-imidazole) phenyl]-corrole.

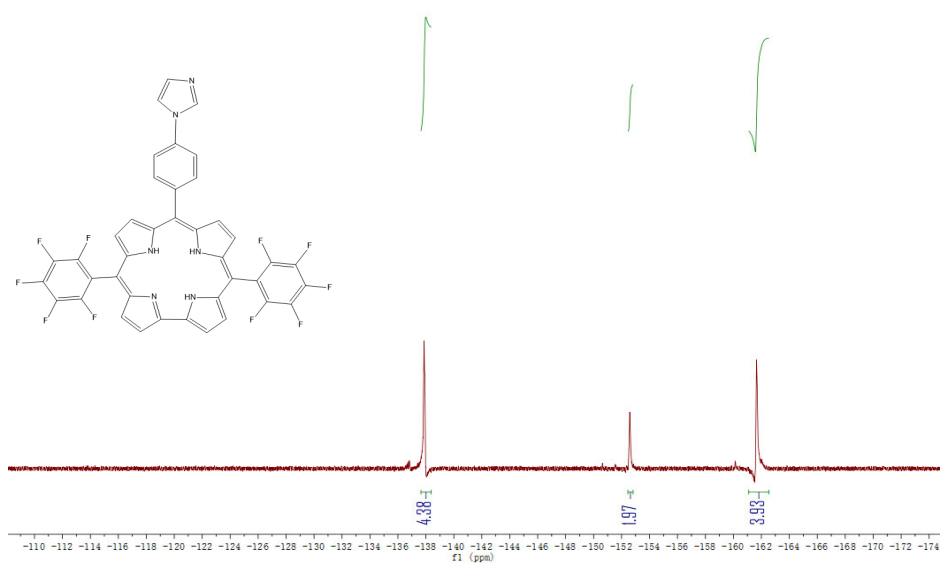

**Figure S3.**  $^{19}\text{F}$  NMR spectrum of 5,15-bis-(pentafluorophenyl)-10-[4-(1H-imidazole) phenyl]-corrole.

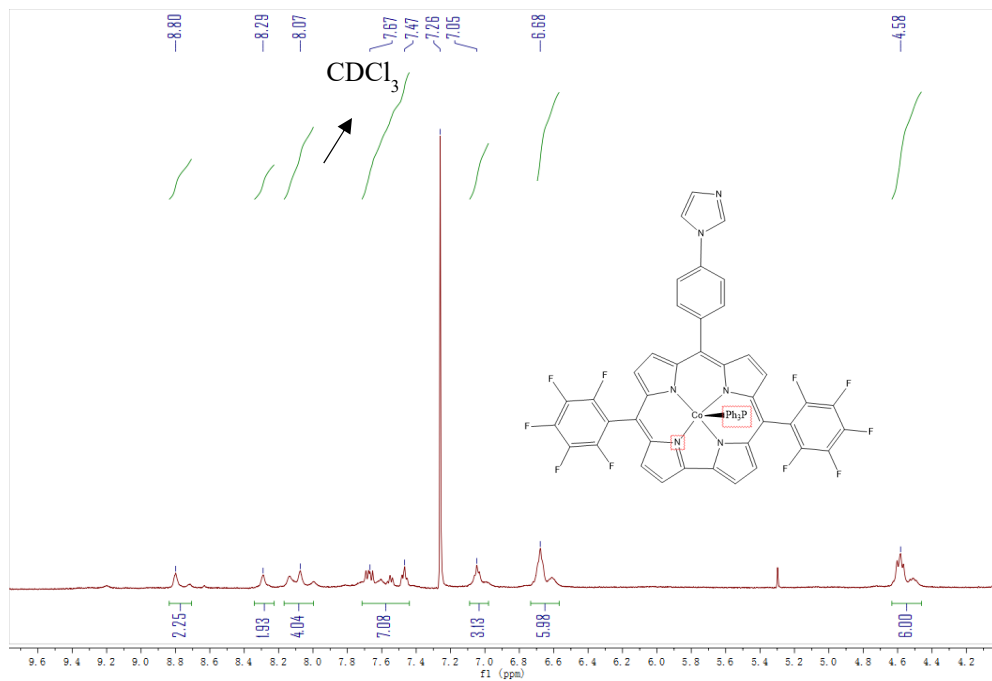

**Figure S4.**  $^1\text{H}$  NMR spectrum of cobalt 5,15-bis-(pentafluorophenyl)-10-[4-(1H-imidazole) phenyl]-corrole.

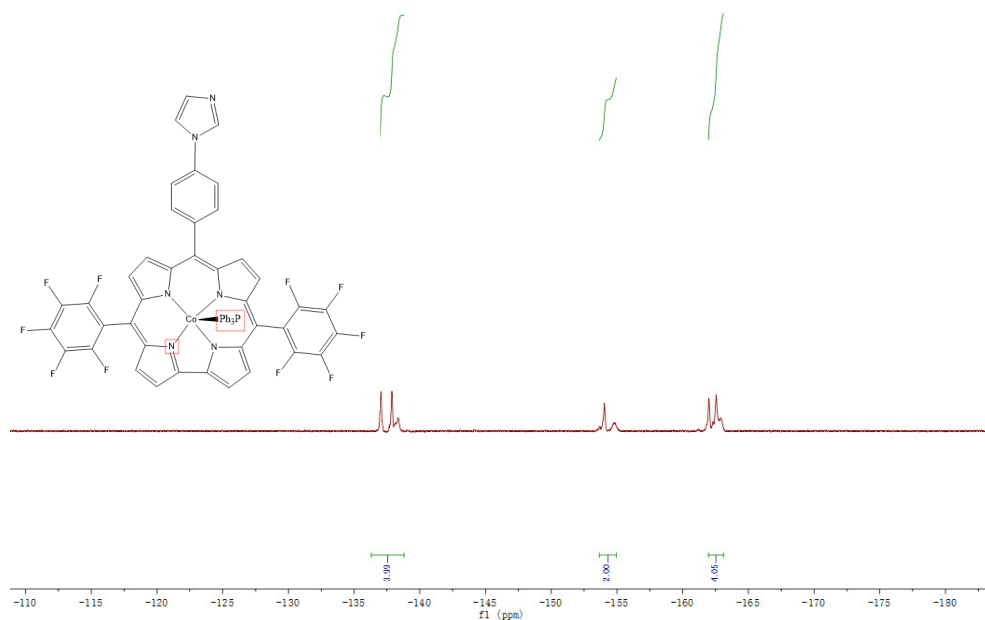

**Figure S5.**  $^{19}\text{F}$  NMR spectrum of cobalt 5,15-bis-(pentafluorophenyl)-10-[4-(1H-imidazole) phenyl]-corrole.

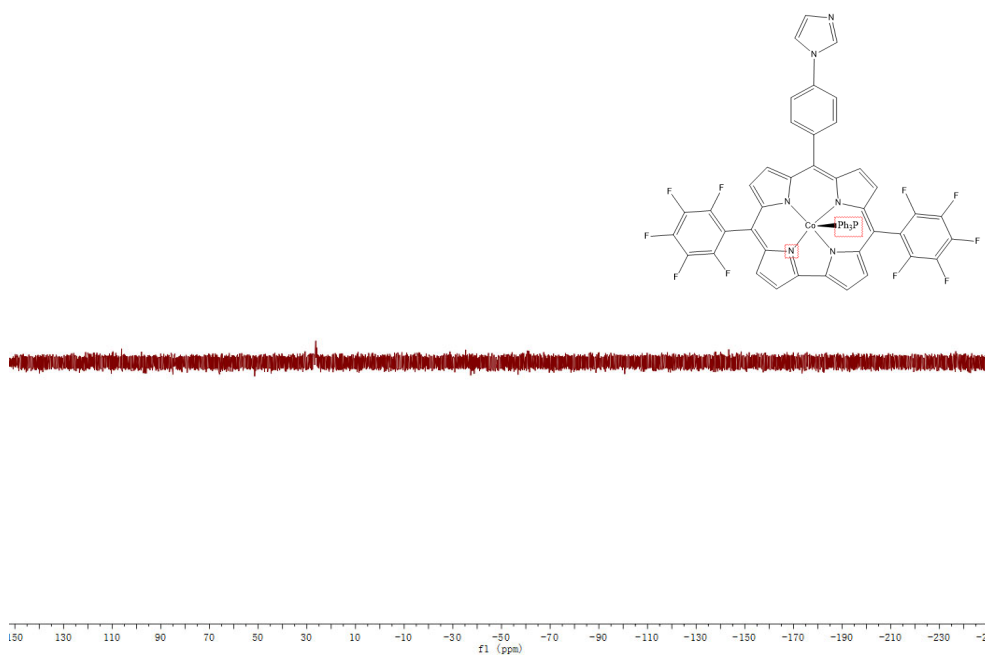

**Figure S6.**  $^{31}\text{P}$  NMR spectrum of cobalt 5,15-bis-(pentafluorophenyl)-10-[4-(1H-imidazole) phenyl]-corrole.

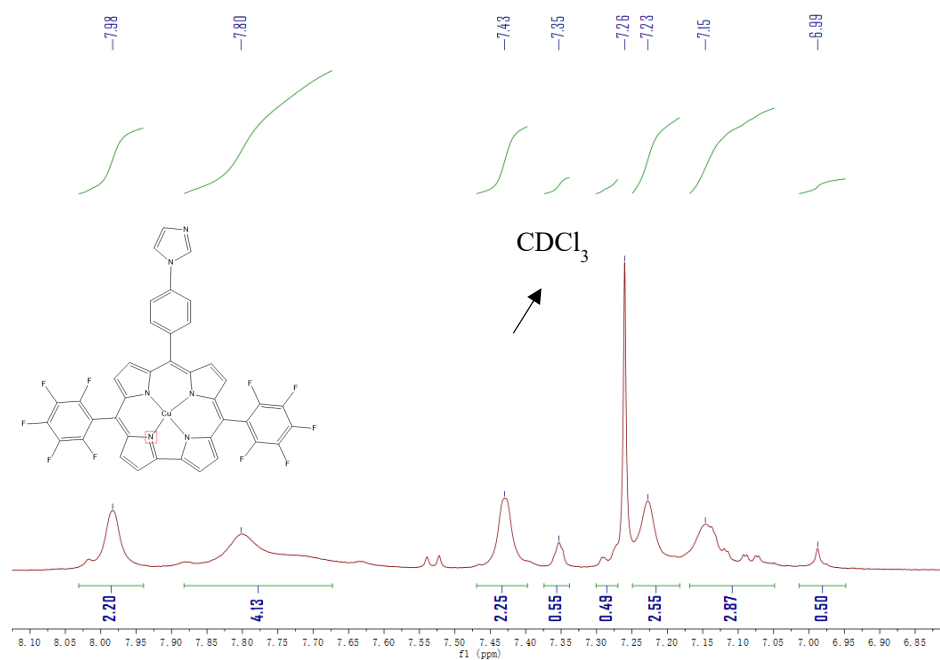

**Figure S7.** <sup>1</sup>H NMR spectrum of copper 5,15-bis-(pentafluorophenyl)-10-[4-(1H-imidazole) phenyl]-corrole.

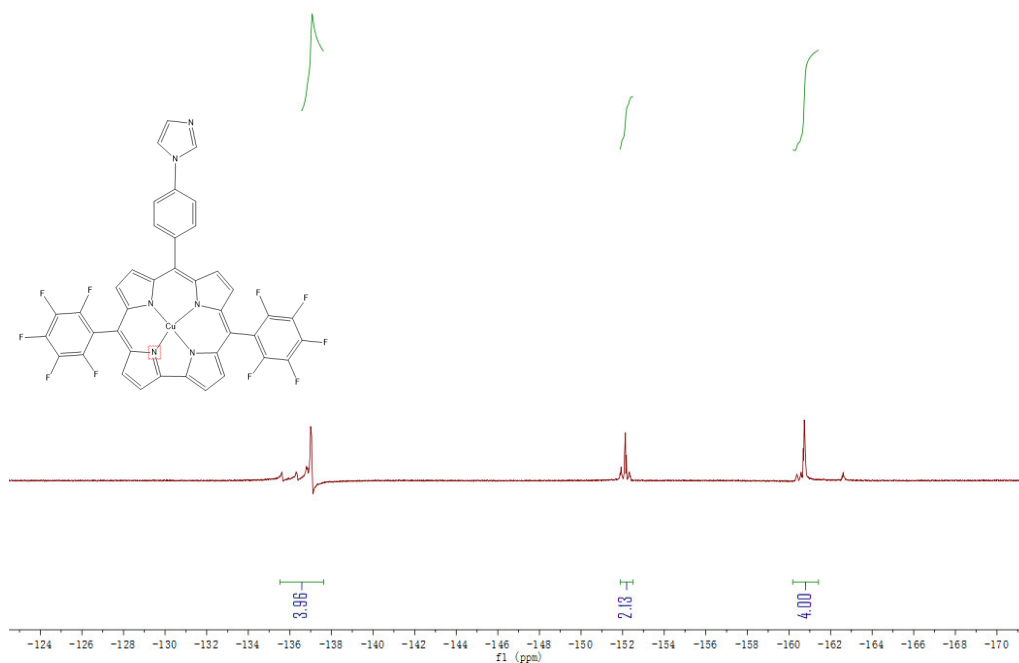

**Figure S8.** <sup>19</sup>F NMR spectrum of copper 5,15-bis-(pentafluorophenyl)-10-[4-(1H-imidazole) phenyl]-corrole.

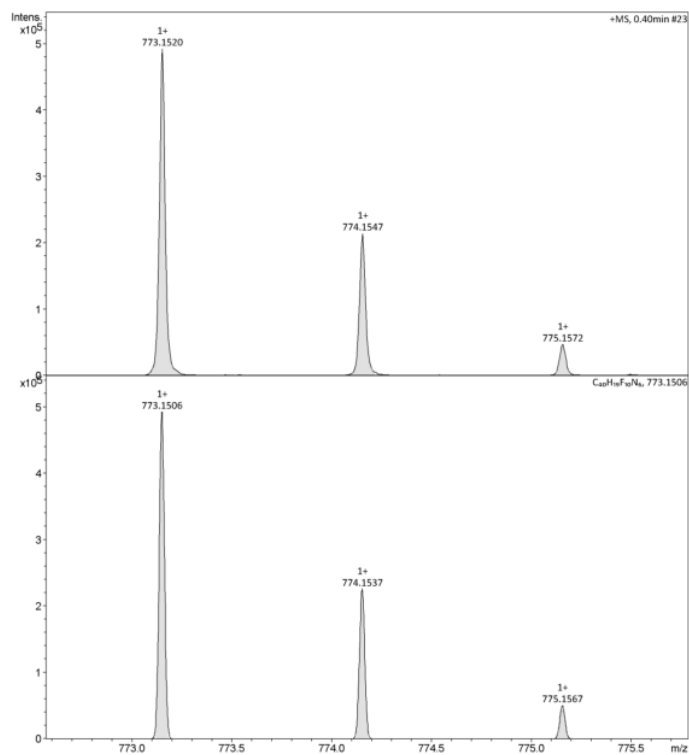

**Figure S9.** High resolution mass spectrum of 5,15-bis-(pentafluorophenyl)-10-[4-(1H-imidazole) phenyl]- corrole.

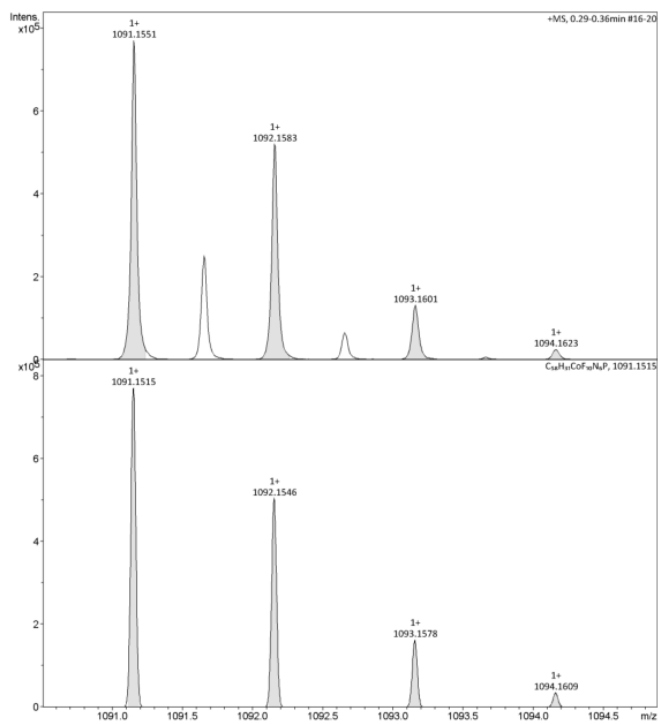

**Figure S10.** High resolution mass spectrum of cobalt 5,15-bis-(pentafluorophenyl)-10-[4-(1H-imidazole) phenyl]- corrole.

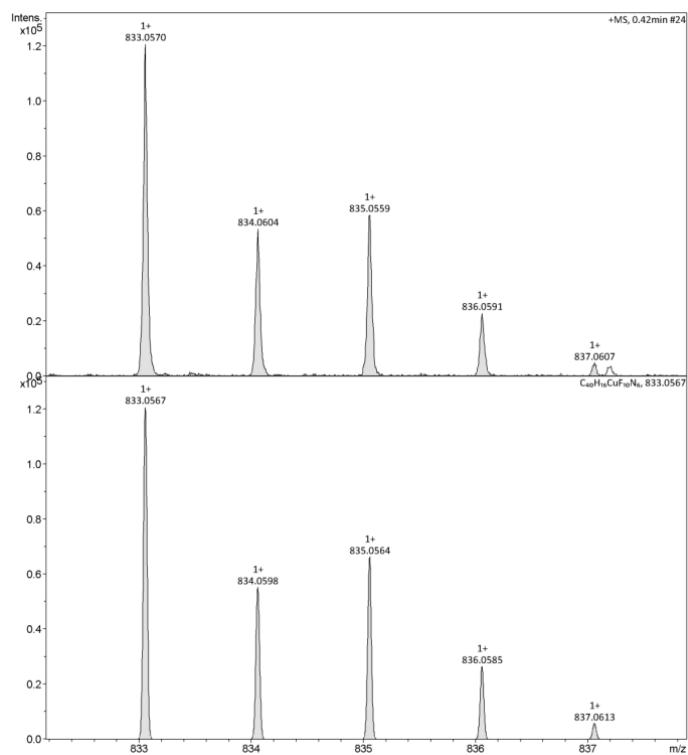

**Figure S11.** High resolution mass spectrum of copper 5,15-bis-(pentafluorophenyl)-10-[4-(1H-imidazole phenyl)]- corrole.

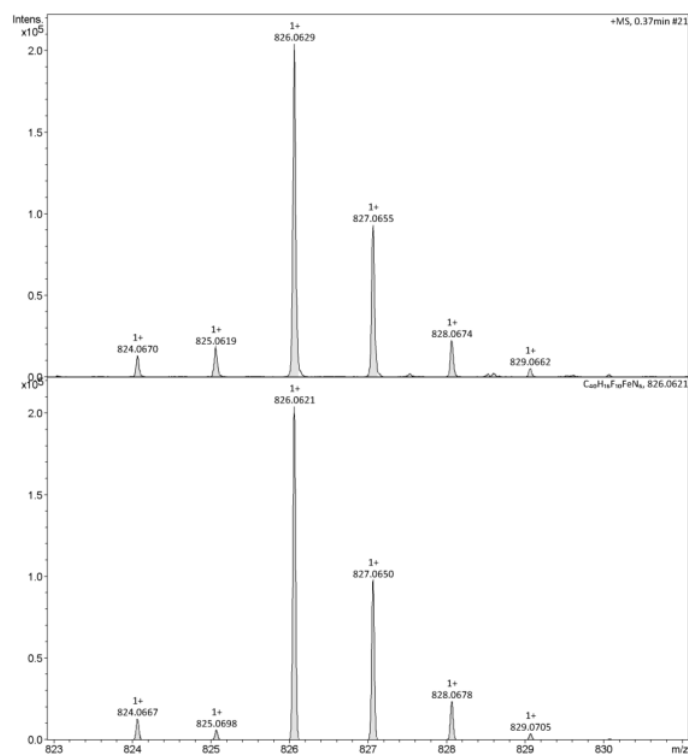

**Figure S12.** High resolution mass spectrum of iron 5,15-bis-(pentafluorophenyl)-10-[4-(1H-imidazole phenyl)]- corrole.

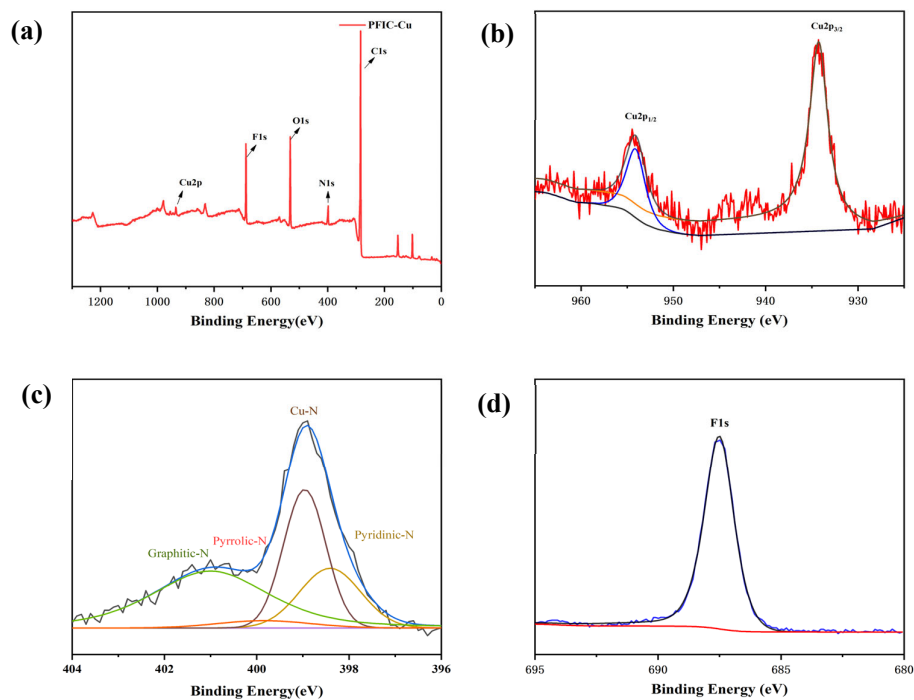

**Figure S13.** XPS survey spectrum of PFIC-Cu (a); XPS spectra of Cu 2p (b) and N 1s (c) and F 1s (d) of PFIC-Cu.

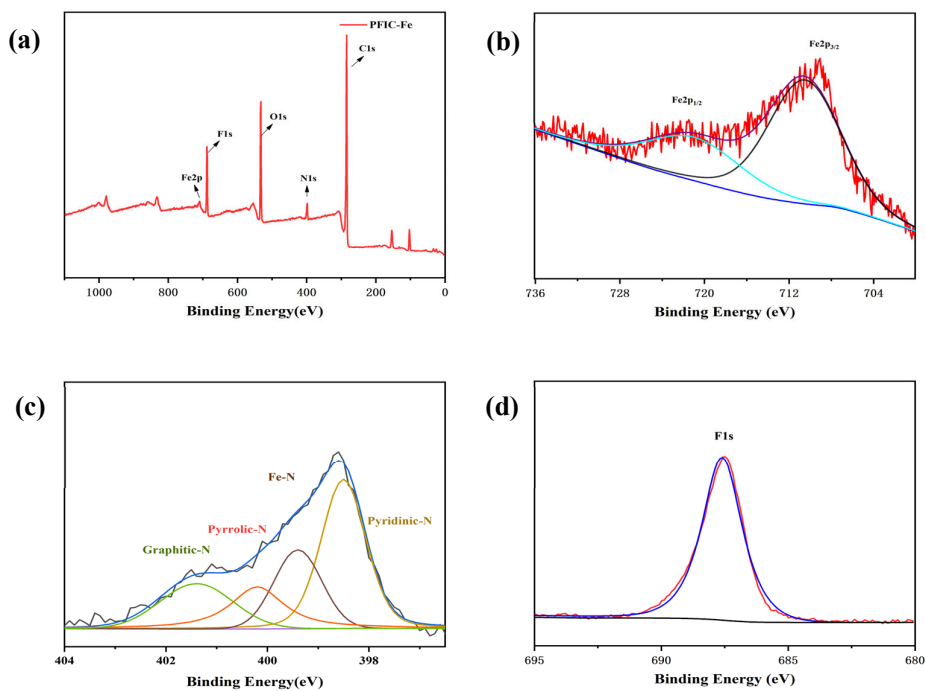

**Figure S14.** XPS survey spectrum of PFIC-Fe (a); XPS spectra of Fe 2p (b) and N 1s (c) and F 1s (d) of PFIC-Fe.

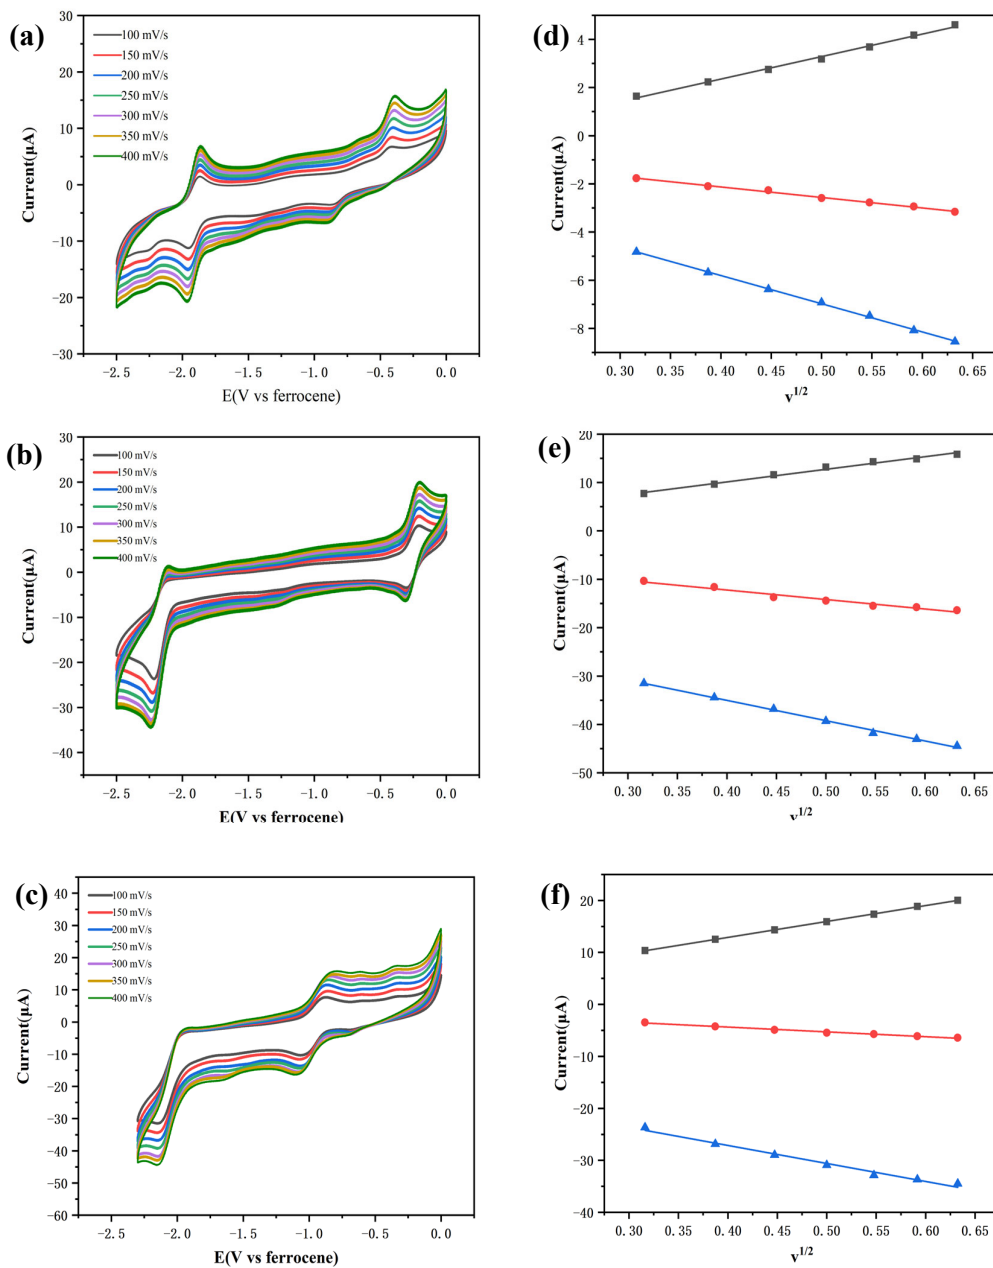

**Figure S15.** Plots of metal corrole complexes Co, Cu, and Fe (a-c, 1.0 mM) for sweep rate ( $v$ ) variations of 100-400 mV/s and peak currents ( $i_p$ ) versus square root of the sweep rate ( $v^{1/2}$ ) for the reduction and first oxidation peaks (d-f).



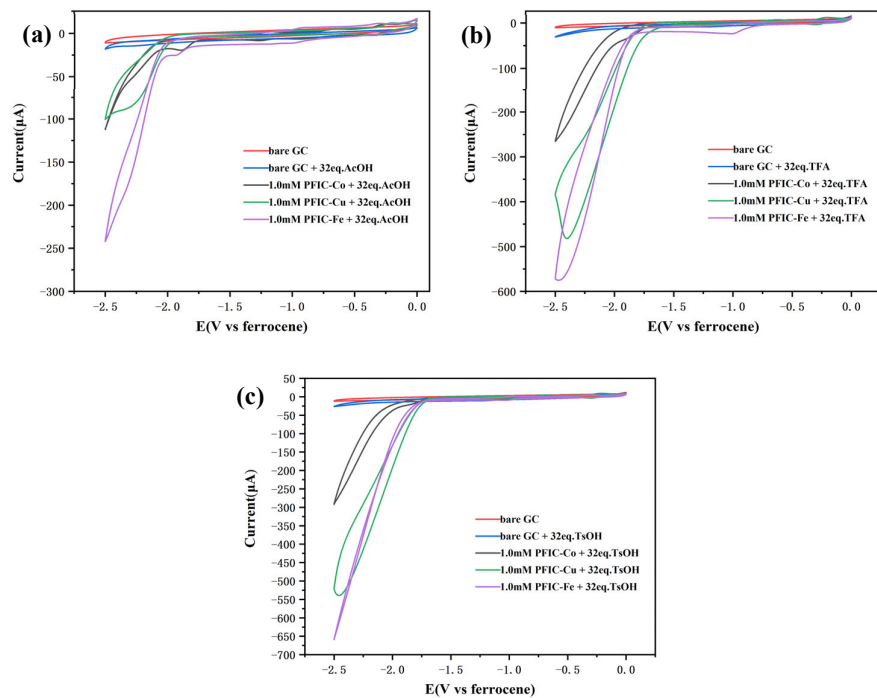

**Figure S16.** Comparison of CV test between bare GC and PFIC-Co, PFIC-Cu and PFIC-Fe at high acid concentration.

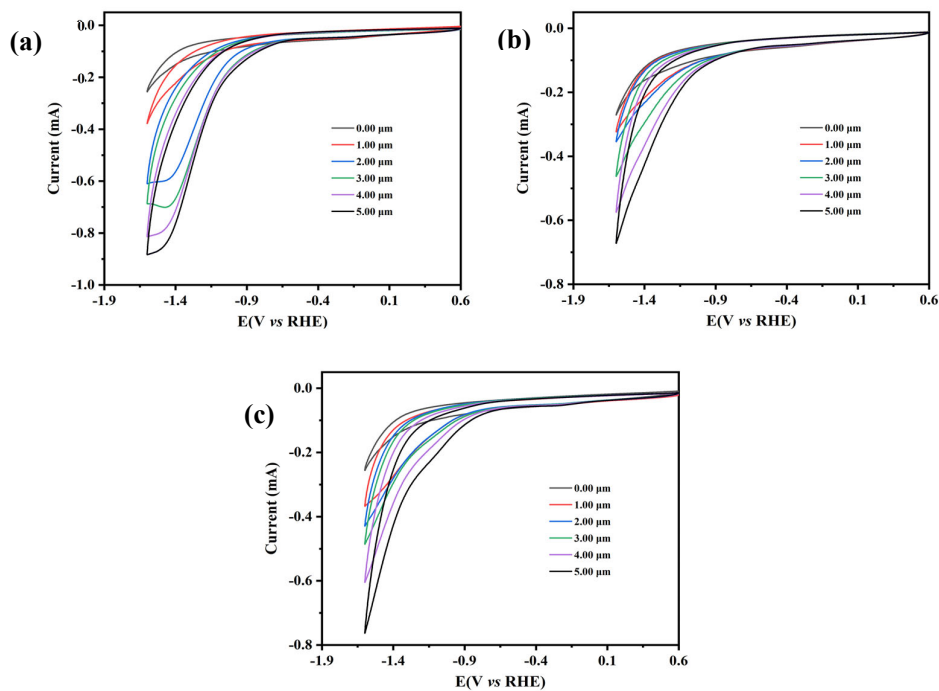

**Figure S17.** CV plots (0.00-5.00  $\mu\text{M}$ ) of different concentrations of metallacorrole complexes (PFIC-Co(a), PFIC-Cu(b), PFIC-Fe(c)) in a mixed system of acetonitrile and water (pH = 7).

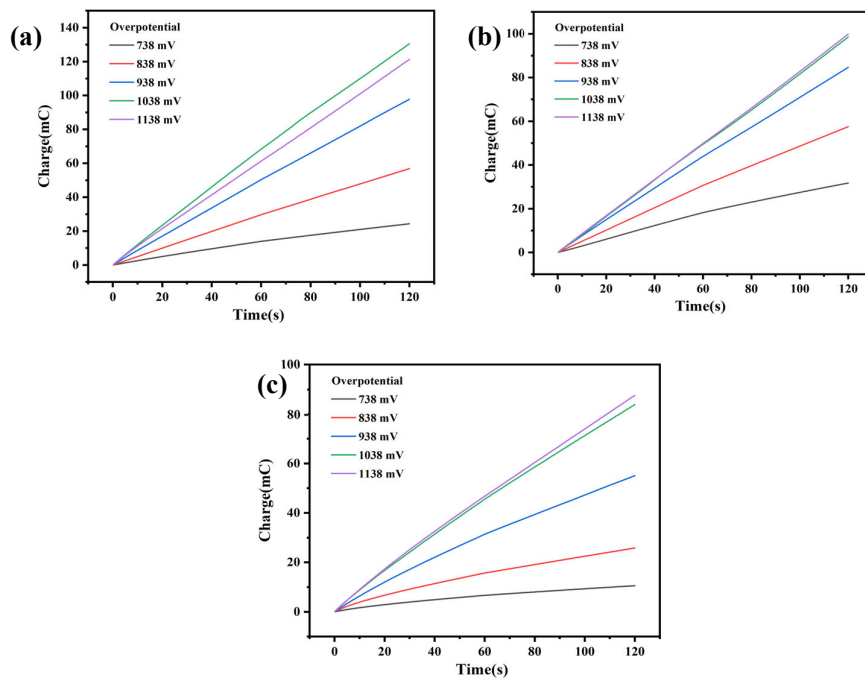

**Figure S18.** (a) Charge increase for **PFIC-Co** (5.00  $\mu\text{M}$ ), (b) Charge increase for **PFIC-Cu** (5.00  $\mu\text{M}$ ), (c) Charge increase for **PFIC-Fe** (5.00  $\mu\text{M}$ ) at different overpotentials.

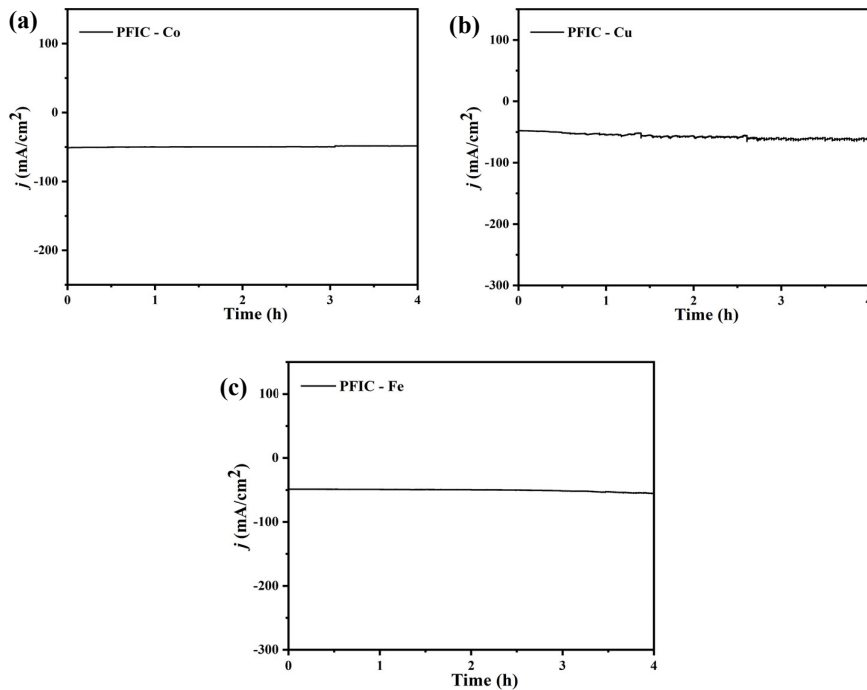

**Figure S19.** Catalytic current versus time obtained from 4 h CPE with 5.00  $\mu\text{M}$  (a) PFIC -Co, (b) PFIC - Cu (c) PFIC-Fe in buffer solution at -1.04 V vs. RHE.

**Table S1.** Crystal data and structure refinement for PFEC-Co.

| Identification code                            | Cu                                                               |
|------------------------------------------------|------------------------------------------------------------------|
| Empirical formula                              | C <sub>46</sub> H <sub>29</sub> CuF <sub>10</sub> N <sub>6</sub> |
| Formula weight                                 | 919.29                                                           |
| Temperature/K                                  | 100                                                              |
| Crystal system                                 | monoclinic                                                       |
| Space group                                    | P2 <sub>1</sub> /n                                               |
| a/Å                                            | 18.0785(8)                                                       |
| b/Å                                            | 5.4994(2)                                                        |
| c/Å                                            | 39.0484(15)                                                      |
| $\alpha/^\circ$                                | 90                                                               |
| $\beta/^\circ$                                 | 90.15(5)                                                         |
| $\gamma/^\circ$                                | 90                                                               |
| Volume/Å <sup>3</sup>                          | 3882.2(3)                                                        |
| Z                                              | 4                                                                |
| $\rho_{\text{calc}}/\text{cm}^3$               | 1.573                                                            |
| $\mu/\text{mm}^{-1}$                           | 1.612                                                            |
| F(000)                                         | 1864.0                                                           |
| Crystal size/mm <sup>3</sup>                   | 0.08 × 0.05 × 0.04                                               |
| Radiation                                      | CuK $\alpha$ ( $\lambda$ = 1.54178)                              |
| 2 $\Theta$ range for data collection/ $^\circ$ | 4.526 to 127.79                                                  |
| Index ranges                                   | -21 ≤ h ≤ 20, -6 ≤ k ≤ 6, -44 ≤ l ≤ 45                           |
| Reflections collected                          | 21887                                                            |
| Independent reflections                        | 6257 [R <sub>int</sub> = 0.1202, R <sub>sigma</sub> = 0.1010]    |
| Data/restraints/parameters                     | 6257/0/570                                                       |
| Goodness-of-fit on F <sup>2</sup>              | 1.003                                                            |
| Final R indexes [I > 2 $\sigma$ (I)]           | R <sub>1</sub> = 0.0747, wR <sub>2</sub> = 0.1864                |
| Final R indexes [all data]                     | R <sub>1</sub> = 0.1170, wR <sub>2</sub> = 0.2189                |
| Largest diff. peak/hole / e Å <sup>-3</sup>    | 0.59/-0.91                                                       |

**Table S2.** Catalytic performance parameters of three metal complexes in TFA system.

| Complex | i <sub>cat</sub> /i <sub>p</sub> | TOF, s <sup>-1</sup> | Efficiency (C.E) |
|---------|----------------------------------|----------------------|------------------|
| PFIC-Co | 30.40                            | 217                  | 0.95             |
| PFIC-Cu | 23.79                            | 109                  | 0.74             |
| PFIC-Fe | 25.42                            | 125                  | 0.79             |

**Table S3.** Catalytic performance parameters of three metal complexes in TsOH system.

| Complex | i <sub>cat</sub> /i <sub>p</sub> | TOF, s <sup>-1</sup> | Efficiency (C.E) |
|---------|----------------------------------|----------------------|------------------|
| PFIC-Co | 33.58                            | 265                  | 1.04             |
| PFIC-Cu | 26.76                            | 138                  | 0.84             |
| PFIC-Fe | 23.79                            | 109                  | 0.74             |

**Table S4.** HER activity for transition metal corroles in organic solvent by using organic acids as proton.

| Catalysts                                       | Proton source | Solvent      | Onset potential (V) | Overpotential (mV) | TOF (s <sup>-1</sup> ) | Refs.     |
|-------------------------------------------------|---------------|--------------|---------------------|--------------------|------------------------|-----------|
| PFIC-Co                                         | TsOH          | DMF          | -1.71               | 780(10 $\mu$ A)    | 265                    | This work |
| PFIC-Cu                                         | TsOH          | DMF          | -1.63               | 700(10 $\mu$ A)    | 138                    | This work |
| PFIC-Fe                                         | TsOH          | DMF          | -1.81               | 880(10 $\mu$ A)    | 109                    | This work |
| ((CF <sub>3</sub> ) <sub>4</sub> -tpfc) Cu      | TFA           | Acetonitrile | -1.85               | 1030(50 $\mu$ A)   | 227                    | [1]       |
| PFEC-Fe                                         | TFA           | DMF          | 1.71                | 735(20 $\mu$ A)    | 13                     | [2]       |
| (4-BPFC) Co                                     | TsOH          | DMF          | -1.83               | 900(20 $\mu$ A)    | 93                     | [3]       |
| (3-BPSC) Co                                     | TsOH          | DMF          | -1.77               | 840(20 $\mu$ A)    | 187                    | [3]       |
| Co (PBHC)                                       | TsOH          | DMF          | -1.48               | 507(10 $\mu$ A)    | 203                    | [4]       |
| Co (TPC)                                        | TsOH          | DMF          | -1.56               | 630(10 $\mu$ A)    | 381                    | [5]       |
| Co(dmg) <sub>2</sub> Cl(pyridine)               | MES           | ">@QJIDMCS   | -1.43               | 515(10 $\mu$ A)    | 930                    | [6]       |
| Co(dmg) <sub>2</sub> Cl (4-ethylamine pyridine) | MES           | ">@QJIDMCS   | -1.11               | 457(10 $\mu$ A)    | 1350                   | [7]       |

**Table S5.** Faraday efficiency of transition metal complexes in nature homogeneous aqueous solution.

| Complex                                                  | Faraday efficiency (%) | Solution | Refs.     |
|----------------------------------------------------------|------------------------|----------|-----------|
| PFIC-Co                                                  | 94.7                   | Buffer   | This work |
| PFIC-Cu                                                  | 91.3                   | Buffer   | This work |
| PFIC-Fe                                                  | 89.8                   | Buffer   | This work |
| ((CF <sub>3</sub> ) <sub>4</sub> -tpfc) Cu               | 74                     | Water    | [1]       |
| PFEC-Fe                                                  | 85.3                   | Buffer   | [2]       |
| Co (PBHC)                                                | 91.1                   | Buffer   | [4]       |
| Co (TPC)                                                 | 98                     | Buffer   | [5]       |
| Co (BPCC)                                                | 92                     | Buffer   | [5]       |
| Fe (TPFC)Cl                                              | 93                     | Water    | [8]       |
| [Ni-en-P <sub>2</sub> ] (ClO <sub>4</sub> ) <sub>2</sub> | 93                     | Buffer   | [9]       |

1. Sudhakar, K., et al., *Copper Complexes of CF<sub>3</sub>-Substituted Corroles for Affecting Redox Potentials and Electrocatalysis*. ACS Applied Energy Materials, 2020. **3**(3): p. 2828-2836.
2. Yadav, P., et al., *Hydrogen evolution catalysis by terminal molybdenum-oxo complexes*. iScience, 2021. **24**(8): p. 102924.
3. Dolganov, A.V., et al., *Control of the substituent at the nitrogen atom in a 2,4,6-triphenylpyridinium perchlorates tunes the electrocatalytic hydrogen evolution mechanism and efficiency*. International Journal of Hydrogen Energy, 2020. **45**(1): p. 501-507.
4. Lv, Z.-Y., et al., *Electrocatalytic Hydrogen Evolution of the Cobalt Triaryl Corroles Bearing Hydroxyl Groups*. 2023. **26**(12): p. e202200755.
5. Liu, Z.Y., et al., *Electrocatalytic hydrogen production by CN-substituted cobalt triaryl corroles*. Catalysis Science & Technology, 2022. **12**(16): p. 5125-5135.

6. Dolui, D., et al., *Enzyme-Inspired Synthetic Proton Relays Generate Fast and Acid-Stable Cobalt-Based H<sub>2</sub> Production Electrocatalysts*. ACS Catalysis, 2019. **9**(11): p. 10115-10125.
7. Dolui, D., A.Q. Mir, and A. Dutta, *Probing the peripheral role of amines in photo- and electrocatalytic H<sub>2</sub> production by molecular cobalt complexes*. Chemical Communications, 2020. **56**(94): p. 14841-14844.
8. Zhong, Y.-Q., et al., *A comparative study of electrocatalytic hydrogen evolution by iron complexes of corrole and porphyrin from acetic acid and water*. Transition Metal Chemistry, 2019. **44**(5): p. 399-406.
9. Wang, C.-L., et al., *A new catalyst based on a nickel(II) complex of diiminodiphosphine for hydrogen evolution and oxidation*. International Journal of Hydrogen Energy, 2021. **46**(64): p. 32480-32489.
